# Supplementary material for: Daily consumption of polyphenol-rich grape powder improves muscle strength markers in postmenopausal women
Source: Royal Society of Chemistry journal article supplement (doi:10.1039/d5fo01523e), 2025-01-01
Supplement: d5fo01523e1.xlsx [file d5fo01523e1.xlsx]

## Sheet: data
Participant ID	Treatment	Age	Height_0	Weight_0	BMI_0	SBP_0	DBP_0	Grip strength_0	Grip strength_3	Grip strength_6	Side-by Side Stand_0	Side-by Side Stand_3	Side-by Side Stand_6	Semi Tandem Stand_0	Semi Tandem Stand_3	Semi Tandem Stand_6	Tandem Stand_0	Tandem Stand_3	Tandem Stand_6	Chair Stand_0	Chair Stand_3	Chair Stand_6	Gait Speed_0	Gait Speed_3	Gait Speed_6	SPPB_0	SPPB_3	SPPB_6	Irisin_0	Irisin_3	Irisin_6	Adiponectin_0	Adiponectin_6	Insulin_0	Insulin_6	Glucose_0	Glucose_6	CHO_0	CHO_3	CHO_6	HDLc_0	HDLc_3	HDLc_6	LDLc_0	LDLc_3	LDLc_6	TG_0	TG_3	TG_6
GHS1	Control	78	167	54.3	19.47	121	77.5	16.9	15.5	14.9	10	10	10	10	10	10	10	10	10	9	9.54	9.28	2.66	2.95	3.98	12	12	12	5304.13	2382.85	4568.36	6394.14	10498			92	91	191	182	174	75	73	69	104.4	96.2	90.6	58	64	72
GHS6	Control	72	170	64	22.1453	122	72	19.8	21.45	24.85	10	10	10	10	10	10	10	10	10	18.21	13.83	12.67	3.58	3.83	3.55	9	10	11	8705.75	10919.2	9330.18	10763.3	12939.7	20.829	20.5405	92	90	286	264	286	91	89	95	177.8	157.2	167	86	89	120
GHS8	Control	66	154.5	55.45	23.2298	119.333	69.3333	21.3	22.15	19.85	10	10	10	10	10	10	10	10	10	8.8	8.1	7.2	4.04	3.58	3.77	12	12	12	7382.04	5679.77	7692.28	8039.67	8983.87	23.478	47.8513	90	94	214	214	246	97	100	97	109.4	104.4	141	38	48	40
GHS9	Control	79	166	62.2	22.5722	111.5	65.5	20.8	20.03	20.98	10	10	10	10	10	10	10	10	3.47	8.4	7.68	7.93	2.73	2.41	2.65	12	12	11	8150.3	7498.34	6134.6	13324.9	13736.9	25.3114	29.281	95	93	171	156	170	77	73	76	85.2	71.2	82.8	44	59	56
GHS11	Control	63	163.6	61	22.791	110.333	65	17.69	17.9	18.02	10	10	10	10	10	10	10	10	10	11.54	12.87	12.06	2.83	2.78	2.76	11	11	11	5229.44	5029.85	4242.15	17688.2	19718.5	16.3481	18.1299	92	110	198	189	204	95	85	85	90.8	91.2	104	61	64	75
GHS12	Control	69	168.8	62.1	21.7945	122.5	80.5	20.5	23.37	22.55	10	10	10	10	10	10	10	10	10	8.37	7.57	7.72	3.31	2.91	2.71	12	12	12	7307.43	3846.57	5927.61	9301.01	6829.22	33.5572	42.1004	89	82	192	179	187	58	56	56	124.8	115.4	119.2	46	38	59
GHS15	Control	70	175	63.2	20.6367	121	80.5	14.4	15	15.5	10	10	10	10	10	10	10	7.8	6.63	8.54	10.27	9.84	3.48	3.25	3.25	12	11	11	4732.9		5230.2	11179.1	8366.71			86	84	238	259	262	55	61	58	144.2	171.2	179.6
GHS3	Grape	68	160	60.1	23.4766	85.3333	57	13.4	18.12	18.8	10	10	10	10	10	10	10	10	10	10.37	11.4	10.2	3.69	3.49	3.45	12	11	12	2969.83	2859.56	4370.62	17798.5	9246.7	17.0742	19.1857	85	97	199	213	173	73	80	60	112.8	118.8	99.8	66	71	66
GHS7	Grape	86	162.5	52.1	19.7302	111.667	68.3333	15.02	18.25	18.3	10	10	10	10	10	10	10	4.13	2.63	7.89	10.49	9.49	4.48	3.3	2.88	12	11	10	3488.89	3185.32	2954.6	9799.38	11097.5	24.4313	24.1189	82	78	180	194	181	71	73	67	99	111.2	95.2	50	49	94
GHS10	Grape	71	161.4	53.3	20.4607	101.333	64.3333	13.18	13.15	14.62	10	10	10	10	10	10	10	10	10	15.04	14.87	13.77	3.82	3.55	3.03	10	10	10	5599.01	4903.39	6147.42	16601.2	27220.2	32.1338	24.1189	94	92	203	206	212	100	115	102	90	82.8	94.2	65	41	79
GHS5	Grape	72	160.5	51.45	19.9726	101.333	64	16.4	18.67	18.27	10	10	10	10	10	10	10	10	9.05	11.49	12.04	11.25	2.7	3.22	2.83	11	11	10	5084.55	3997.94	5581.37	17784.2	18208.3	18.4922	23.7517	98	95	162	200	173	57	74	61	92.8	115	96.6	61	55	77
GHS13	Grape	62	171	54.3	18.5698	109	71	19.08	21	21.8	10	10	10	10	10	10	10	10	10	6.52	8.85	8	2.68	2.4	2.43	12	12	12	17654.7	18316.7	20072.7	20160.5	19208.7	26.5908	68.4406	93	91	200	207	207	104	97	99	82.2	98.8	95.2	69	56	64
GHS14	Grape	64	158.9	55.8	22.0997	110.5	74.5	19.2	20.9	19.25	10	10	10	10	10	10	10	10	10	11.09	13.07	11.9	3.54	3.31	2.95	12	11	11	6577.18	4024.75	6355.26	16225.6	10466.6	22.4896	31.2861	94	97	200	177	212	67	70	73	118.8	95.2	124.6	71	59	72
Some values missing due to break of the EDTA tube or being out of the ELISA detection range
[truncated: 54 more columns]
