# Supplementary material for: Daily consumption of polyphenol-rich grape powder improves muscle strength markers in postmenopausal women
Source: Royal Society of Chemistry journal article supplement (doi:10.1039/d5fo01523e), 2025-01-01
Supplement: d5fo01523e2.pdf [file d5fo01523e2.pdf]

**Supplementary Table 1.** Nutrient analysis of freeze-dried table grape powder and control powder

| Nutrient                       | Grape powder<br>(per 46g) | Control powder<br>(per 46g) |
|--------------------------------|---------------------------|-----------------------------|
| Calories (kcal)                | 165.6                     | 169.2                       |
| Total Fatty Acids (g)          | 0.4                       | 0.00817                     |
| Total Carbohydrate (g)(sugars) | 37.72                     | 32.75                       |
| Protein (g)                    | 0.27                      | 0.12                        |
| Calcium (mg)                   | 27.02                     | 10.12                       |
| Copper (mg)                    | 0.19                      | <0.022                      |
| Iron (mg)                      | 0.82                      | 0.18                        |
| Magnesium (mg)                 | 16.9                      | 1.06                        |
| Manganese (mg)                 | 0.21                      | 0.03                        |
| Phosphorus (mg)                | 46                        | 54.83                       |
| Potassium (mg)                 | 474.8                     | 268.75                      |
| Sodium (mg)                    | 14.9                      | 28                          |
| Zinc (mg)                      | 0.11                      | 0.024                       |
| Thiamin (mg)                   | 0.08                      | <0.004                      |
| Folic Acid (mcg)               | 7.15                      | <2.8                        |
| Ash (g)                        | 1.52                      | 0.96                        |
| Moisture (g)                   | 2.71                      | 2.53                        |

**Supplementary Table 2:** Polyphenol content of freeze-dried grape powder

| Compounds                      | Amount (mg/kg) |
|--------------------------------|----------------|
| <b>Total Polyphenols (GAE)</b> | 3540           |
| <b>Catechins</b>               | 17             |
| Catechin                       | 14.6 ± 0.718   |
| Epicatechin                    | 2.43 ± 0.120   |
| <b>Anthocyanins</b>            | 9.82           |
| Peonidin                       | 2.62 ± 0.152   |
| Cyanidin                       | 0.24 ± 0.013   |
| Malvidin                       | 6.96 ± 0.298   |
| <b>Flavonols</b>               |                |
| Kaempferol                     | 0.139 ± 0.018  |
| Isorhamnetin                   | 0.148 ± 0.016  |
| Quercetin                      | 1.58 ± 0.086   |
| <b>Stilbenes</b>               |                |
| Resveratrol (mg/kg)            | 0.33 ± 0.061   |

GAE, gallic acid equivalents.

**Supplemental Table 3.** Estimated percentage changes of the primary interested outcomes from baseline to 3 weeks for each group, based on random intercept gamma models.

| Outcome                                                                                      | Grape                      |              | Control                      |              |
|----------------------------------------------------------------------------------------------|----------------------------|--------------|------------------------------|--------------|
|                                                                                              | Estimate (95% CI)          | P-value      | Estimate (95% CI)            | P-value      |
| <b>Estimated percentage change from Baseline to Week 3 for a 70-year old participant (%)</b> |                            |              |                              |              |
| Average Grip Strength Value                                                                  | <b>14.63 (6.60, 23.26)</b> | <b>0.004</b> | 2.52 (-4.20, 9.72)           | 0.488        |
| Gait Speed Test                                                                              | -6.73 (-16.78, 4.54)       | 0.259        | -3.58 (-13.28, 7.21)         | 0.516        |
| Chair Stand Test                                                                             | <b>15.90 (4.09, 29.05)</b> | <b>0.023</b> | -2.74 (-11.99, 7.49)         | 0.598        |
| Irisin Level                                                                                 | -10.9 (-23.92, 4.26)       | 0.180        | <b>-21.2 (-32.49, -8.03)</b> | <b>0.013</b> |

Abbreviations: CI = Confidence Interval

The results were based on gamma mixed-effects models with log link that included fixed effects of age (centered at 70 years), group (Grape; Control), time at testing (3, 6 weeks), the interaction between group and time, an offset term of log baseline outcome at Week 0, and a random intercept to account for within-subject correlation. For Average Grip Strength Value and Irisin Levels, the interaction was removed due to non-significance. The estimated percentage changes in the outcomes were calculated by (ratios of Week 3 (or 6) to Baseline means) - 1, where the ratios were estimated by exponentiating the linear predictors (excluding the offset) in the fitted models for a 70-year-old participant.

**Supplemental Table 4.** Plasma levels of kidney and liver function parameters over six weeks of dietary intervention with grape powder or control

| Variables                     | Grape       |             |             | Control     |             |             | p-value |      |       |
|-------------------------------|-------------|-------------|-------------|-------------|-------------|-------------|---------|------|-------|
|                               | Baseline    | Week 3      | Week 6      | Baseline    | Week 3      | Week 6      | t       | I    | t x I |
| <b><i>Kidney function</i></b> |             |             |             |             |             |             |         |      |       |
| BUN (mg/dl)                   | 13.5 ± 3.7  | 12.7 ± 3.7  | 13.5 ± 3.9  | 14.4 ± 6.1  | 14.0 ± 7.5  | 13.7 ± 4.5  | 0.70    | 0.77 | 0.75  |
| Creatinine (mg/dl)            | 0.8 ± 0.0   | 0.8 ± 0.1   | 0.8 ± 0.1   | 0.8 ± 0.1   | 0.8 ± 0.1   | 0.8 ± 0.1   | 0.86    | 0.35 | 0.86  |
| Sodium (mmol/l)               | 140.3 ± 2.4 | 140.8 ± 3.8 | 141.0 ± 2.2 | 138.6 ± 4.4 | 140.7 ± 1.7 | 141.6 ± 2.6 | 0.23    | 0.71 | 0.54  |
| Potassium (mmol/l)            | 4.3 ± 1.7   | 4.6 ± 0.4   | 4.9 ± 0.8   | 4.8 ± 0.5   | 5.0 ± 0.6   | 4.8 ± 0.6   | 0.52    | 0.37 | 0.55  |
| Chloride (mmol/l)             | 104.0 ± 2.3 | 104.3 ± 2.1 | 103.8 ± 1.9 | 103.7 ± 2.6 | 104.2 ± 1.6 | 104.0 ± 3.0 | 0.83    | 0.92 | 0.94  |
| Calcium (mmol/l)              | 9.3 ± 0.2   | 9.3 ± 0.2   | 9.4 ± 0.3   | 9.2 ± 0.3   | 9.4 ± 0.2   | 9.2 ± 0.4   | 0.91    | 0.77 | 0.36  |
| <b><i>Liver function</i></b>  |             |             |             |             |             |             |         |      |       |
| Bilirubin (mg/dl)             | 0.5 ± 0.1   | 0.4 ± 0.1   | 0.5 ± 0.1   | 0.5 ± 0.1   | 0.5 ± 0.1   | 0.5 ± 0.1   | 0.34    | 0.83 | 0.39  |
| Albumin (g/dl)                | 4.2 ± 0.1   | 4.2 ± 0.1   | 4.2 ± 0.1   | 4.5 ± 0.3   | 4.4 ± 0.2   | 4.4 ± 0.2   | 0.26    | 0.07 | 0.35  |
| ALP (U/L)                     | 77.8 ± 12.4 | 78.5 ± 11.1 | 80.5 ± 13.0 | 71.1 ± 8.9  | 71.6 ± 8.8  | 70.3 ± 6.9  | 0.86    | 0.17 | 0.49  |
| AST (U/L)                     | 23.7 ± 5.6  | 26.5 ± 9.2  | 24.7 ± 5.6  | 22.4 ± 4.1  | 24.6 ± 2.8  | 27.1 ± 6.6  | 0.26    | 0.93 | 0.45  |
| ALT (U/L)                     | 15.3 ± 5.5  | 16.7 ± 7.8  | 15.5 ± 2.6  | 17.3 ± 6.5  | 17.7 ± 5.2  | 20.7 ± 12.1 | 0.56    | 0.46 | 0.47  |

BUN, Blood Urea Nitrogen; ALP, Alkaline phosphatase; AST, Aspartate aminotransferase; ALT, Alanine aminotransferase; t, effect of time; I, effect of dietary intervention, txI, interaction, from repeated measure mixed analysis ANOVA. Data presented as Mean ± Standard deviation.

**Supplemental Table 5.** Hematological parameters in postmenopausal women over six weeks of dietary intervention with

| Variables                      | Grape      |            |            | Control    |            |            | p-value |      |       |
|--------------------------------|------------|------------|------------|------------|------------|------------|---------|------|-------|
|                                | Baseline   | Week 3     | Week 6     | Baseline   | Week 3     | Week 6     | t       | I    | t x I |
| RBC (million/mm <sup>3</sup> ) | 4.2 ± 0.1  | 4.1 ± 0.1  | 4.2 ± 0.1  | 4.2 ± 0.3  | 4.2 ± 0.2  | 4.3 ± 0.2  | 0.11    | 0.33 | 0.51  |
| WBC (million/mm <sup>3</sup> ) | 5.6 ± 1.4  | 3.8 ± 1.8  | 5.1 ± 1.5  | 4.4 ± 0.7  | 4.5 ± 0.9  | 4.2 ± 0.9  | 0.19    | 0.42 | 0.08  |
| Hematocrit (%)                 | 38.2 ± 1.5 | 37.0 ± 2.1 | 38.0 ± 1.9 | 38.3 ± 2.7 | 37.6 ± 2.2 | 38.9 ± 1.5 | 0.05    | 0.67 | 0.57  |
| Hemoglobin (g/dl)              | 13.0 ± 0.6 | 12.5 ± 0.9 | 13.0 ± 0.7 | 12.7 ± 1.1 | 12.6 ± 0.6 | 13.0 ± 0.5 | 0.03    | 0.85 | 0.38  |
| MCV (fl)                       | 90.8 ± 4.3 | 89.9 ± 3.9 | 91.2 ± 5.1 | 90.2 ± 3.6 | 90.0 ± 3.9 | 90.2 ± 3.9 | 0.58    | 0.72 | 0.67  |
| MCH (pg)                       | 30.8 ± 1.8 | 30.4 ± 1.7 | 31.1 ± 2.0 | 29.9 ± 1.5 | 30.2 ± 1.8 | 30.3 ± 1.7 | 0.13    | 0.44 | 0.85  |
| MCHC (%)                       | 33.9 ± 0.6 | 33.7 ± 0.8 | 34.1 ± 0.7 | 33.1 ± 0.5 | 33.6 ± 0.9 | 33.5 ± 0.5 | 0.30    | 0.15 | 0.50  |

grape powder or control.

RBC, Red blood cells, WBC, White blood cells; MCV, Mean corpuscular volume; MCH, Mean corpuscular hemoglobin; MCHC, Mean corpuscular hemoglobin concentration; p-values for the effect of time (t); effect of supplementation (I), and their interaction (txI), from repeated measure mixed analysis ANOVA. Data presented as Mean ± Standard deviation.
